# Supplementary material for: CCR2 of Tumor Microenvironmental Cells Is a Relevant Modulator of Glioma Biology
Source: MDPI journal article supplement (doi:10.3390/cancers12071882), 2020-07-13
Supplement: s1 [file s1]

# CCR2 of Tumor Microenvironmental Cells is a Relevant Modulator of Glioma Biology

Matthäus Felsenstein, Anne Blank, Alexander D. Bungert, Annett Mueller, Adnan Ghori, Irina Kremenetskaia, Olga Rung, Thomas Broggini, Kati Turkowski, Lea Scherschinski, Jonas Raggatz, Peter Vajkoczy and Susan Brandenburg

## Supplementary Tables

Table S1. Primer sequences.

| gene          | primer forward (5'-3')            | primer reverse (5'-3')          | reference |
|---------------|-----------------------------------|---------------------------------|-----------|
| <i>m18S</i>   | AACCCGTTGAACCCCAT                 | CCATCCAATCGGTAGTAGCG            | [1]       |
| <i>mCcr2</i>  | GTTACCTCAGTTCATCCA                | CAAGGCTCACCATCATCGTAGTC         | [1]       |
| <i>mStat3</i> | GAAGGGAGGCAAAGGGGAACA             | ACTTGTCTAACAACCAACCCCC          | designed  |
| <i>mArg1</i>  | AACACGGCAGTGGCTTTAACC             | GGTTTTCATGTGGCGCATTC            | [2]       |
| <i>mc-Myc</i> | CACCAGCAGCGACTCTGAA               | GCCCGACTCCGACCTCTTG             | [3]       |
| <i>mYkl40</i> | ATGCACACCTCTACTGAAGCC             | ACCAGCTTGACGCAGAGC              | [4]       |
| <i>mIl10</i>  | CCCTGGGTGAGAAGCTGAAG              | CACTGCCTTGCTCTTATTTTCA          | [5]       |
| <i>mTgfβ</i>  | TTGCTTCAGCTCCACAGAGA              | TGGTTGTAGAGGGCAAGGAC            | [5]       |
| <i>mStat1</i> | CTGAATATTTCCCTCCTGGG              | TCCCGTACAGATGTCCATGAT           | [6]       |
| <i>mIrf7</i>  | CACCCCATCTTCGACTTCA               | CCAAAACCCAGGTAGATGGTGTA         | [7]       |
| <i>mCox2</i>  | AGTTGATAACCGAGTCGTTCTG            | CTGTTGCTTGATTTAGTC              | [8]       |
| <i>mSmad7</i> | GACTCCAGGACGCTGTTGGT              | CCATGGTTGCTGCATGAACT            | [9]       |
| <i>miNos</i>  | CGAAACGCTTCACCTCCAA               | TGAGCCTATATTGCTGTGGCT           | [2]       |
| <i>mTnfα</i>  | CACAGCCTTCCTCACAGAGC              | GGAGGCAACAAGGTAGAGAGG           | [5]       |
| <i>mIfrβ</i>  | CCAGCTCCAAGAAAGGACGA              | CGCCCTGTAGGTGAGGTTGAT           | [10]      |
| <i>mIl1α</i>  | GGCTCACTTCATGAGACTTGC             | AGGTGTAAGGTGCTGATCTGG           | [5]       |
| <i>mIl1β</i>  | ATCACTCATTGTGGCTGTGG              | CATCTCGGAGCCTGTAGTGC            | [5]       |
| <i>mIl6</i>   | GACTGATGCTGGTGACAACC              | TTCTGCAAGTGCATCATCG             | [5]       |
| <i>mIl12α</i> | TACTAGAGAGACTTCTTCCACAACA<br>AGAG | TCTGGTACATCTTCAAGTCCTCATAG<br>A | [5]       |
| <i>mVegf</i>  | GAAGAAGAGGCCTGGTAATGG             | AAGCCACTCACACACACAGC            | [1]       |
| <i>mS1p1</i>  | TCAGGGAACCTTTCGAGTG               | AGTGAGCCTTCAGTTACAGC            | [11]      |
| <i>mPdgrβ</i> | ATCCGCTCCTTTGATGATCT              | GAGCTTTCCAACCTCGACTCC           | [12]      |
| <i>mTac1</i>  | GGCCAAGGAGAGCAAAGA                | CGAGGATTTTCATGTTTCGATT          | [13]      |
| <i>mEdn1</i>  | GCACAACCGAGCACATTG                | CCAGCCAGCATGGAGAGT              | designed  |
| <i>mAng1</i>  | GCCTACACTTTCATTCTCCAGA            | TCTTCCTTGTTTTCCTTCCAT           | [14]      |
| <i>mAng2</i>  | GGCAGCGTTGATTTTCAGAGGACT          | TTAATGCCGTTGAACCTATTGT          | [14]      |
| <i>mMmp2</i>  | CAGGGAATGAGTACTGGGTCTATT          | ACTCCAGTTAAAGGCAGCATCTAC        | [15]      |
| <i>mMmp9</i>  | ATCTCTTCTAGAGACTGGGAAGGAG         | AGCTGATTGACTAAAGTAGCTGGA        | [15]      |
| <i>h18S</i>   | GGCCCTGTAATTGGAATGAGTC            | CCAAGATCCAACCTACGAGCTT          | [16]      |
| <i>hCCR2</i>  | TGTCCACATCTCGTTCTCGGT             | CCGCTCTCGTTGGTATTTCTGA          | [17]      |

Table S2. Basic expression of molecules.

| gene         | WT N<br>(RQ ± SD) | Ccr2KO N<br>(RQ ± SD) |
|--------------|-------------------|-----------------------|
| <i>Stat3</i> | 1.02 ± 0.24       | 1.30 ± 0.18           |
| <i>Arg1</i>  | 1.02 ± 0.28       | 1.77 ± 1.90           |
| <i>c-Myc</i> | 1.03 ± 0.29       | <b>0.54 ± 0.02</b>    |
| <i>Ykl40</i> | 1.12 ± 0.57       | 1.93 ± 1.01           |
| <i>Il10</i>  | 1.02 ± 0.26       | 0.71 ± 0.20           |
| <i>Tgfβ</i>  | 1.00 ± 0.09       | <b>0.35 ± 0.13</b>    |
| <i>Stat1</i> | 1.08 ± 0.55       | 0.88 ± 0.29           |

|              |             |                    |
|--------------|-------------|--------------------|
| <i>Irf7</i>  | 1.03 ± 0.33 | <b>1.96 ± 0.48</b> |
| <i>Cox2</i>  | 1.01 ± 0.15 | <b>6.29 ± 1.95</b> |
| <i>Smad7</i> | 1.09 ± 0.52 | <b>0.19 ± 0.07</b> |
| <i>iNos</i>  | 1.13 ± 0.66 | 0.71 ± 0.80        |
| <i>Tnfa</i>  | 1.01 ± 0.18 | 0.83 ± 0.29        |
| <i>Ifnβ</i>  | 1.05 ± 0.38 | 1.14 ± 0.20        |
| <i>Il1α</i>  | 1.08 ± 0.49 | 0.43 ± 0.05        |
| <i>Il1β</i>  | 1.04 ± 0.34 | 0.87 ± 0.42        |
| <i>Il6</i>   | 1.03 ± 0.31 | <b>0.36 ± 0.09</b> |
| <i>Il12α</i> | 1.12 ± 0.65 | <b>12.7 ± 5.83</b> |

<sup>bold</sup>significant up- or down-regulated to WT N.

## Reference

1. Brandenburg, S.; Muller, A.; Turkowski, K.; Radev, Y.T.; Rot, S.; Schmidt, C.; Bungert, A.D.; Acker, G.; Schorr, A.; Hippe, A.; et al. Resident microglia rather than peripheral macrophages promote vascularization in brain tumors and are source of alternative pro-angiogenic factors. *Acta Neuropathol.* **2016**, *131*, 365–378. DOI: 10.1007/s00401-015-1529-6
2. Nasser, M.W.; Qamri, Z.; Deol, Y.S.; Ravi, J.; Powell, C.A.; Trikha, P.; Schwendener, R.A.; Bai, X.F.; Shilo, K.; Zou, X.; et al. S100A7 enhances mammary tumorigenesis through upregulation of inflammatory pathways. *Cancer Res.* **2012**, *72*, 604–615. DOI: 10.1158/0008-5472.CAN-11-0669
3. Levy, J.; Cacheux, W.; Bara, M.A.; L'Hermitte, A.; Lepage, P.; Fraudeau, M.; Trentesaux, C.; Lemarchand, J.; Durand, A.; Crain, A.M.; et al. Intestinal inhibition of Atg7 prevents tumour initiation through a microbiome-influenced immune response and suppresses tumour growth. *Nat. Cell Biol.* **2015**, *17*, 1062–1073. DOI: 10.1038/ncb3206
4. Chung, C.; Kim, T.; Kim, M.; Kim, M.; Song, H.; Kim, T.S.; Seo, E.; Lee, S.H.; Kim, H.; Kim, S.K.; et al. Hippo-Foxa2 signaling pathway plays a role in peripheral lung maturation and surfactant homeostasis. *Proc. Natl. Acad. Sci. U. S. A.* **2013**, *110*, 7732–7737. DOI: 10.1073/pnas.1220603110
5. Brandenburg, S.; Turkowski, K.; Mueller, A.; Radev, Y.T.; Seidlitz, S.; Vajkoczy, P. Myeloid cells expressing high level of CD45 are associated with a distinct activated phenotype in glioma. *Immunol. Res.* **2017**, *65*, 757–768. DOI: 10.1007/s12026-017-8915-1
6. Shaul, M.E.; Bennett, G.; Strissel, K.J.; Greenberg, A.S.; Obin, M.S. Dynamic, M2-like remodeling phenotypes of CD11c+ adipose tissue macrophages during high-fat diet--induced obesity in mice. *Diabetes* **2010**, *59*, 1171–1181. DOI: 10.2337/db09-1402
7. Henault, J.; Martinez, J.; Riggs, J.M.; Tian, J.; Mehta, P.; Clarke, L.; Sasai, M.; Latz, E.; Brinkmann, M.M.; Iwasaki, A.; et al. Noncanonical autophagy is required for type I interferon secretion in response to DNA-immune complexes. *Immunity* **2012**, *37*, 986–997. DOI: 10.1016/j.immuni.2012.09.014
8. Lv, Y.J.; Yang, Y.; Sui, B.D.; Hu, C.H.; Zhao, P.; Liao, L.; Chen, J.; Zhang, L.Q.; Yang, T.T.; Zhang, S.F.; et al. Resveratrol counteracts bone loss via mitofilin-mediated osteogenic improvement of mesenchymal stem cells in senescence-accelerated mice. *Theranostics* **2018**, *8*, 2387–2406. DOI: 10.7150/thno.23620
9. Saika, S.; Ikeda, K.; Yamanaka, O.; Miyamoto, T.; Ohnishi, Y.; Sato, M.; Muragaki, Y.; Ooshima, A.; Nakajima, Y.; Kao, W.W.; et al. Expression of Smad7 in mouse eyes accelerates healing of corneal tissue after exposure to alkali. *Am. J. Pathol.* **2005**, *166*, 1405–1418. DOI: 10.1016/S0002-9440(10)62358-9
10. Watanabe, A.; Tatematsu, M.; Saeki, K.; Shibata, S.; Shime, H.; Yoshimura, A.; Obuse, C.; Seya, T.; Matsumoto, M. Raftlin is involved in the nucleocapture complex to induce poly(I:C)-mediated TLR3 activation. *J. Biol. Chem.* **2011**, *286*, 10702–10711. DOI: 10.1074/jbc.M110.185793
11. Liu, G.; Bi, Y.; Wang, R.; Yang, H.; Zhang, Y.; Wang, X.; Liu, H.; Lu, Y.; Zhang, Z.; Chen, W.; et al. Targeting S1P1 receptor protects against murine immunological hepatic injury through myeloid-derived suppressor cells. *J. Immunol.* **2014**, *192*, 3068–3079. DOI: 10.4049/jimmunol.1301193
12. Pozniak, K.N.; Pearen, M.A.; Pereira, T.N.; Kramer, C.S.M.; Kalita-De Croft, P.; Nawaratna, S.K.; Fernandez-Rojo, M.A.; Gobert, G.N.; Tirnitz-Parker, J.E.E.; Olynyk, J.K.; et al. Taurocholate Induces Biliary Differentiation of Liver Progenitor Cells Causing Hepatic Stellate Cell Chemotaxis in the Ductular Reaction: Role in Pediatric Cystic Fibrosis Liver Disease. *Am. J. Pathol.* **2017**, *187*, 2744–2757. DOI: 10.1016/j.ajpath.2017.08.024

13. Shi, C.; Das, V.; Li, X.; Kc, R.; Qiu, S.; I, O.S.; Ripper, R.L.; Kroin, J.S.; Mwale, F.; Wallace, A.A.; et al. Development of an in vivo mouse model of discogenic low back pain. *J. Cell. Physiol.* **2018**, *233*, 6589–6602. DOI: 10.1002/jcp.26280
14. El-Nabarawy, E.A.; El-Hanafy, G.M.; Rashed, L.A.; Yasin, F.S. Expression of angiopoietin-1, angiopoietin-2, and their receptor Tie2 in verruca vulgaris (common skin warts). *Int. J. Dermatol.* **2016**, *55*, e327–e331. DOI: 10.1111/ijd.13191
15. Sharma-Walia, N.; Patel, K.; Chandran, K.; Marginean, A.; Bottero, V.; Kerur, N.; Paul, A.G. COX-2/PGE2: molecular ambassadors of Kaposi's sarcoma-associated herpes virus oncoprotein-v-FLIP. *Oncogenesis* **2012**, *1*, e5. DOI: 10.1038/oncsis.2012.5
16. Kiselak, E.A.; Shen, X.; Song, J.; Gude, D.R.; Wang, J.; Brody, S.L.; Strauss, J.F., 3rd; Zhang, Z. Transcriptional regulation of an axonemal central apparatus gene, sperm-associated antigen 6, by a SRY-related high mobility group transcription factor, S-SOX5. *J. Biol. Chem.* **2010**, *285*, 30496–30505. DOI: 10.1074/jbc.M110.121590
17. Jakob, M.; Hemeda, H.; Janeschik, S.; Bootz, F.; Rotter, N.; Lang, S.; Brandau, S. Human nasal mucosa contains tissue-resident immunologically responsive mesenchymal stromal cells. *Stem Cells Dev* **2010**, *19*, 635–644. DOI: 10.1089/scd.2009.0245
