# Supplementary material for: CCR2 of Tumor Microenvironmental Cells Is a Relevant Modulator of Glioma Biology
Source: MDPI journal article supplement (doi:10.3390/cancers12071882), 2020-07-13
Supplement: s1 [file s1]

# CCR2 of tumor microenvironmental cells is a relevant modulator of glioma biology

Matthäus Felsenstein <sup>1,‡</sup>, Anne Blank <sup>1</sup>, Alexander D. Bungert <sup>1</sup>, Annett Mueller <sup>1</sup>, Adnan Ghori <sup>1</sup>, Irina Kremenetskaia <sup>1</sup>, Olga Rung <sup>1</sup>, Thomas Broggini <sup>1,‡</sup>, Kati Turkowski <sup>1</sup>, Lea Scherschinski <sup>1</sup>, Jonas Ragatz <sup>1</sup>, Peter Vajkoczy <sup>1,2,‡,\*</sup> and Susan Brandenburg <sup>1,‡</sup>

## Supplementary Figures

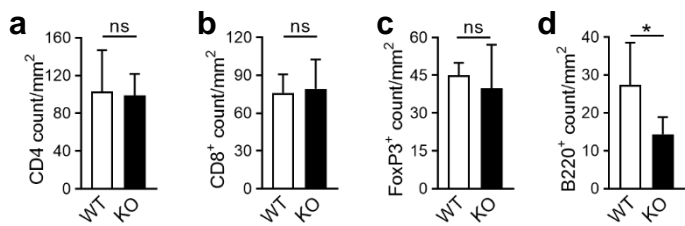

**Figure S1.** Infiltration of T cells into tumor tissues is unaffected by *Ccr2*-deficiency but B cell counts are reduced. Brain tumor tissues of WT and *Ccr2*KO mice (d21) were stained for CD4, CD8, FoxP3 and B220 (n= 3-5). Graphs depict numbers of counted T helper cells (CD4<sup>+</sup>) (a), cytotoxic T cells (CD8<sup>+</sup>) (b), regulatory T cells (FoxP3<sup>+</sup>) (c) and B lymphocytes (B220<sup>+</sup>) (d). ns, not significant; \**p* < 0.05 (unpaired Student's *t* test).

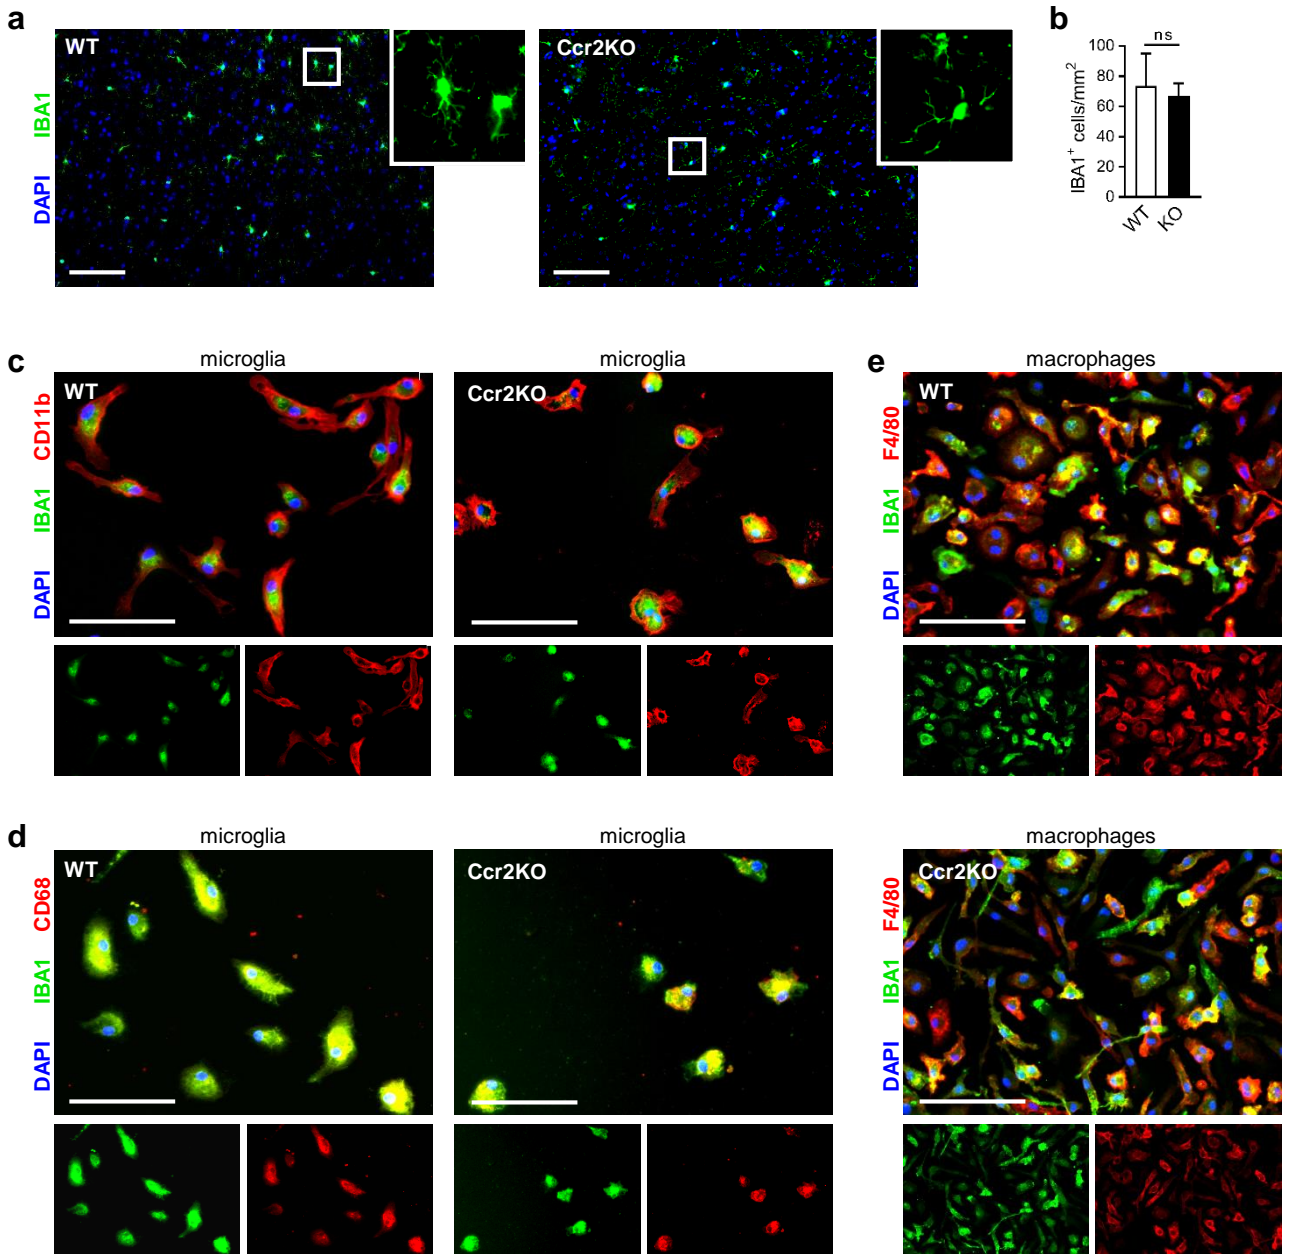

**Figure S2.** Myeloid cells of naïve *Ccr2*-deficient mice show same morphology and marker expression as the wildtypes. **(a)** Representative images of immunofluorescence staining for IBA1 of contralateral hemispheres of WT and Ccr2KO mouse brains. *Squares* illustrate magnified areas. *Scale bars* 100  $\mu$ m. **(b)** Graph depicts IBA1<sup>+</sup> cell count on brain sections from non-tumor bearing hemispheres (n= 5-6). ns, not significant (unpaired Student's t test). **(c,d)** Myeloid cells were isolated from naïve WT and Ccr2KO brains using the surface molecule CD11b for selection. Isolated cells were cultured in tumor-conditioned medium for seven days. Cells were stained for IBA1 and CD11b **(c)** and CD68 **(d)**. *Scale bars* 100  $\mu$ m. **(e)** Isolated bone marrow cells of WT and Ccr2KO mice were cultured with M-CSF for eight days. Afterwards macrophages were harvested and seeded in tumor-conditioned medium for four days. Cells were stained for IBA1 and F4/80. *Scale bars* 100  $\mu$ m.

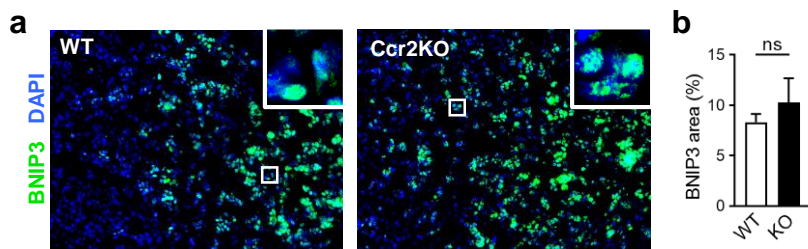

**Figure S3.** BNIP3 is localized in the nucleus and expressed by tumors of the wildtype and Ccr2KO mice. **(a)** BNIP3 was stained on tumor-bearing brains (d21). *Squares* indicate magnified regions. 20x magnification. **(b)** Graph depicts area of BNIP3 expression (n= 5). ns, not significant (unpaired Student's t test).

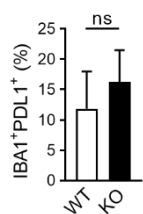

**Figure S4.** Percentage of TAMs expressing PDL1 is comparable between wildtype and *Ccr2*KO mice. PDL1 is stained with IBA1 on tumor-bearing brain sections of wildtype and *Ccr2*<sup>-/-</sup> mice (d21). Graph depicts calculation of IBA1<sup>+</sup> cells expressing PDL1 (n= 4-5). ns, not significant (unpaired Student's t test).

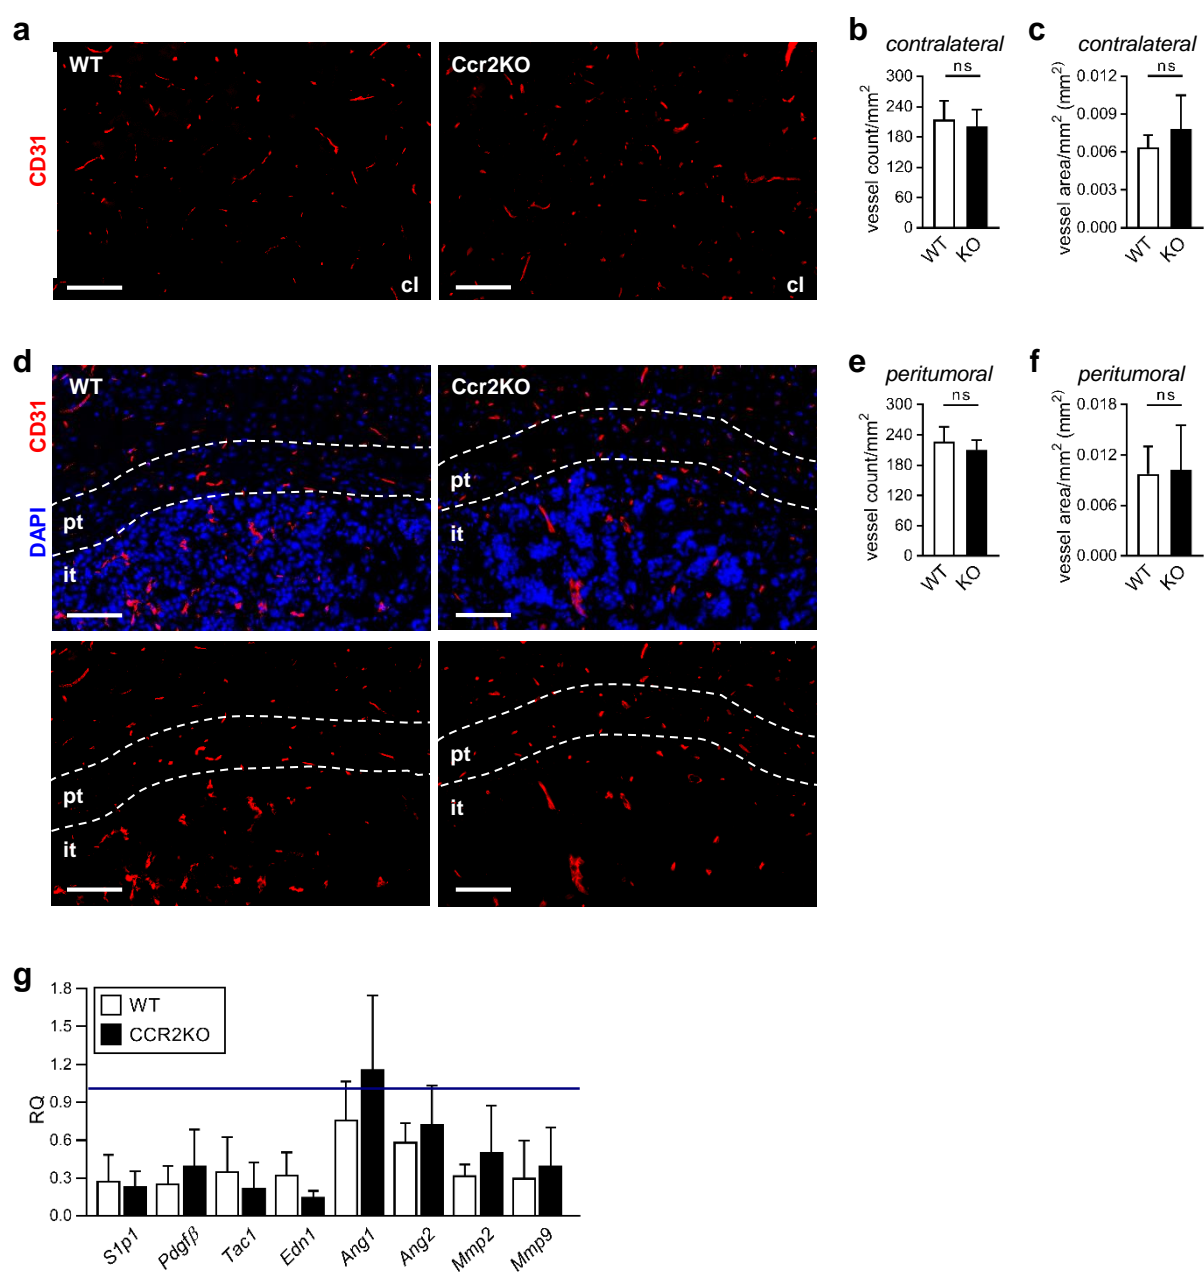

**Figure S5.** Vascular structure of brains is similar between mouse strains. **(a,d)** Representative images of immunofluorescence staining for CD31 of contralateral (cl) hemispheres **(a)** and the tumor border **(d)** of WT and Ccr2KO mouse brains. *Dashed lines* define peritumoral area (pt; it, intratumoral area). *Scale bars* 100  $\mu$ m. **(b,c,e,f)** Graphs depict vessel numbers **(b,e)** and vascularized areas **(c,f)** of non-tumor bearing hemispheres (n= 5-6) **(b,c)** and peritumoral region (n= 6) **(e,f)**. ns, not significant (unpaired Student's t test). **(g)** RT-PCRs for indicated genes of CD11b<sup>+</sup> cells from tumor-bearing brain tissues of WT as well as Ccr2KO mice are presented (d21; n= 3-4). *Blue line* defines basic molecule expression in naïve WT mice.
